# Supplementary material for: Construction of a molecularly imprinted fluorescent sensor based on an amphiphilic block copolymer-metal–organic framework for the detection of oxytetracycline in milk
Source: Royal Society of Chemistry journal article supplement (doi:10.1039/d3ay01567j), 2023-12-15
Supplement: d3ay01567j1.pdf [file d3ay01567j1.pdf]

## Supporting Information

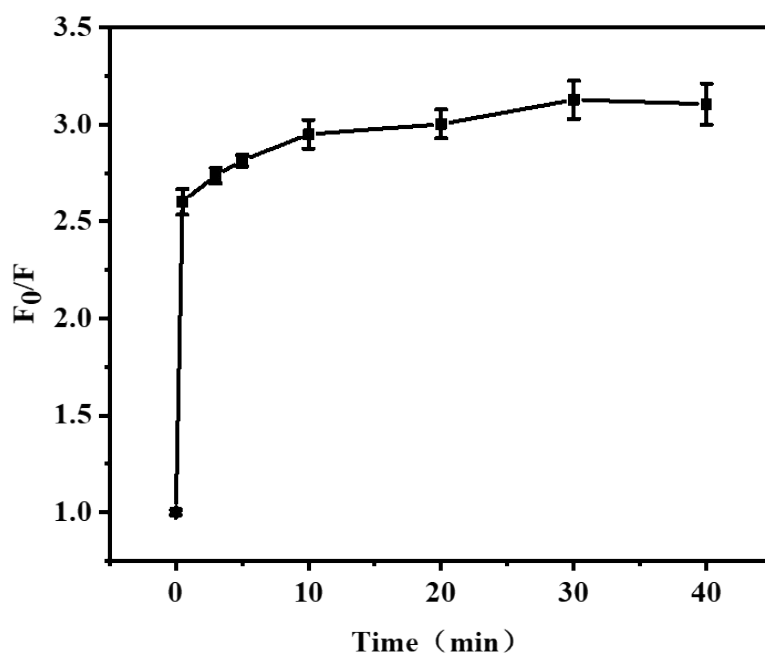

Figure S1. Response time of  $80 \mu\text{mol}\cdot\text{L}^{-1}$  oxytetracycline detected by PAVE-MOF-MIP

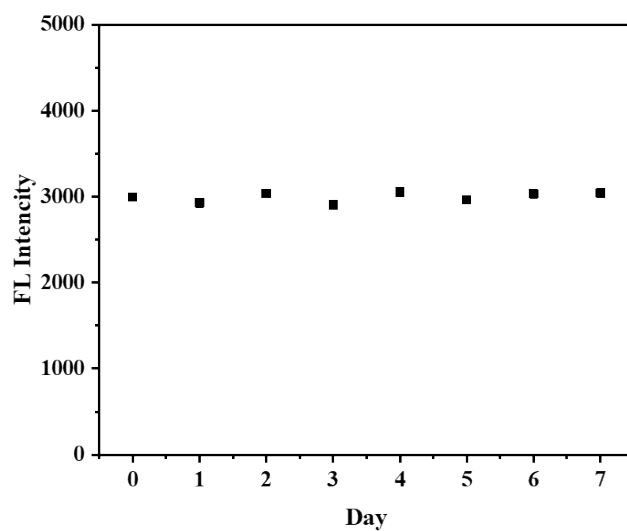

Figure S2. Fluorescence intensity changes of PAVE-MOF-MIP stored in the dark for 7 days

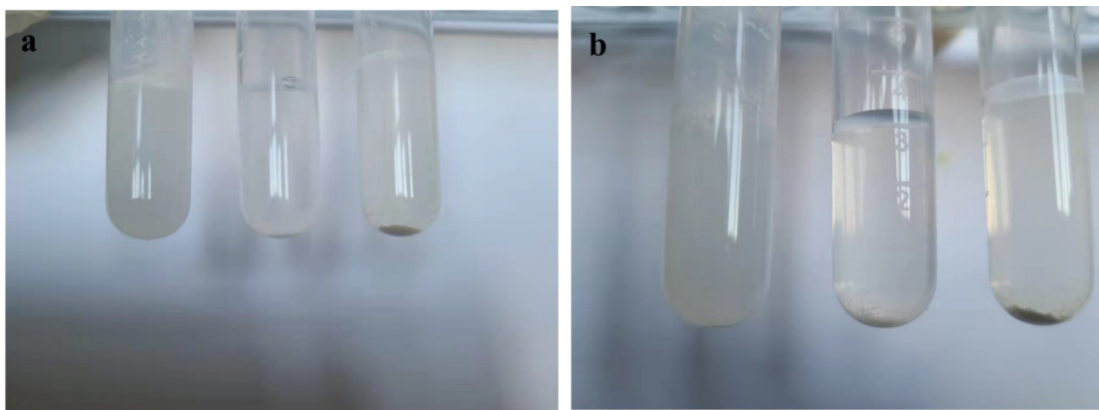

Figure S3. Dispersion of PAVE-MOF-MIP, UiO-66-NH<sub>2</sub> and MIP-MOF (From left to right) in Aqueous Solution (a) after ultrasonic dispersion; (b) after 3 days of standing.
